## **Derivation and external validation of a clinical prognostic model identifying children at risk of death following presentation for diarrheal care**

Authors:

Sharia M. Ahmed (Division of Infectious Diseases, University of Utah School of Medicine, [Sharia.M.Ahmed@utah.edu](mailto:Sharia.M.Ahmed@utah.edu))

Ben J. Brintz (Division of Epidemiology, University of Utah School of Medicine, [ben.brintz@hsc.utah.edu](mailto:ben.brintz@hsc.utah.edu)); PhD

Alison Talbert (KEMRI/Wellcome Trust Research Programme, Centre for Geographic Medicine Research, Kilifi, Kenya, [atalbert@kemri-wellcome.org](mailto:atalbert@kemri-wellcome.org)); MBBS

Moses Ngari (KEMRI/Wellcome Trust Research Programme, Centre for Geographic Medicine Research, Kilifi, Kenya, [MNgari@kemri-wellcome.org](mailto:MNgari@kemri-wellcome.org)); DrPhilos

Patricia B. Pavlinac (Department of Global Health, Global Center for Integrated Health of Women, Adolescents and Children (Global WACH), University of Washington, Seattle, WA, USA, [ppav@uw.edu](mailto:ppav@uw.edu)); PhD

James A. Platts-Mills (Division of Infectious Diseases and International Health, University of Virginia, Charlottesville, VA, USA, [JP5T@hscmail.mcc.virginia.edu](mailto:JP5T@hscmail.mcc.virginia.edu)); MD

Adam C. Levine (Department of Emergency Medicine, Warren Alpert Medical School of Brown University, Providence, RI, USA, [adam\\_levine@brown.edu](mailto:adam_levine@brown.edu)); MD

Eric J. Nelson (Department of Pediatrics and Environmental and Global Health, Emerging Pathogens Institute, University of Florida, Gainesville, FL, USA, [eric.nelson@ufl.edu](mailto:eric.nelson@ufl.edu)); MD PhD

Judd L. Walson (Department of Global Health, University of Washington, Seattle, WA, USA, [walson@uw.edu](mailto:walson@uw.edu)); MD

Karen L. Kotloff (Department of Pediatrics, Center for Vaccine Development and Global Health, University of Maryland School of Medicine, Baltimore, MD, USA, [Kkotloff@som.umaryland.edu](mailto:Kkotloff@som.umaryland.edu)); MD

James A. Berkley (KEMRI/Wellcome Trust Research Programme, Centre for Geographic Medicine Research, Kilifi, Kenya, [JBerkley@kemri-wellcome.org](mailto:JBerkley@kemri-wellcome.org)); MD

Daniel T. Leung (Division of Infectious Diseases, University of Utah School of Medicine, [Daniel.leung@utah.edu](mailto:Daniel.leung@utah.edu)); MD

Target journals: Plos Med; Clin Infectious Disease, PLOS Global Public Health, JAMA Network Open, AJPH.

Funding: This work was supported by National Institutes of Health under Ruth L. Kirschstein National Research Service Award NIH T32AI055434 and by the National Institute of Allergy and Infectious Diseases (R01AI135114). The funders had no role in study design, data collection and interpretation, or the decision to submit the work for publication.

Corresponding authors:

SMA ([sharia.m.ahmed@utah.edu](mailto:sharia.m.ahmed@utah.edu))

DTL ([Daniel.Leung@utah.edu](mailto:Daniel.Leung@utah.edu))

## ABSTRACT

Diarrhea continues to be a leading cause of death for children under-five. Amongst children treated for acute diarrhea, mortality risk remains elevated during and after acute medical management. Identification of those at highest risk would enable better targeting of interventions, but available prognostic tools lack validation. We used clinical and demographic data from the Global Enteric Multicenter Study (GEMS) to build predictive models for death (in-treatment, after discharge, or either) in children aged  $\leq 59$  months presenting with moderate-to-severe diarrhea (MSD), in Africa and Asia. We screened variables using random forests, and assessed predictive performance with random forest regression and logistic regression using repeated cross-validation. We used data from the Kilifi Health and Demographic Surveillance System (KHDSS) and Kilifi County Hospital (KCH) in Kenya to externally validate our GEMS-derived clinical prognostic model (CPM). Of 8060 MSD cases, 43 (0.5%) children died in treatment and 122 (1.5% of remaining) died after discharge. MUAC at presentation, respiratory rate, age, temperature, number of days with diarrhea at presentation, number of people living in household, number of children  $< 60$  months old living in household, and how much the child had been offered to drink since diarrhea started were predictive of death both in treatment and after discharge. Using a parsimonious 2-variable prediction model, we achieve an AUC=0.84 (95% CI: 0.82, 0.86) in the derivation dataset, and an AUC=0.74 (95% CI 0.71, 0.77) in the external dataset. Our findings suggest it is possible to identify children most likely to die after presenting to care for acute diarrhea. This could represent a novel and cost-effective way to target resources for the prevention of childhood mortality.

## 1 INTRO

2 Close to 500,000 children under 5 years of age die from diarrhea every year, mostly in  
3 low- and middle-income countries (LMICs). While children at higher risk of severe outcomes are  
4 more likely to be admitted to treatment[1], there is also growing recognition that the risk of death  
5 remains elevated even after treatment discharge[1-5]. In fact, some evidence suggests that young  
6 children may be at the greatest risk of death after being discharged from care[6, 7]. Clinicians  
7 may benefit from tools to help identify children at greater risk of death, in order to target them  
8 for additional care or follow-up interventions[5, 6].

9 In this study, we aimed to develop clinical prognostic models (CPMs) to identify those  
10 most likely to die among community-dwelling children under 5 years presenting to care for acute  
11 diarrhea. CPMs are algorithms that aid clinicians in interpreting clinical findings and making  
12 clinical decisions[8]. Building on this body of literature, we used machine learning methods on  
13 data from two large multi-center studies to derive and validate prediction models for death, both  
14 during treatment and post-discharge from treatment, with the hopes of reliably identifying  
15 children that would most benefit from intervention.

## 16 METHODS

### 17 Study Population for Derivation Cohort 1 (GEMS)

18 We derived CPMs for death using data from cases from The Global Enteric Multicenter  
19 Study (GEMS), which has previously been described in-depth[7, 9]. GEMS was a prospective  
20 case-control study of acute moderate to severe diarrhea (MSD) in children 0-59 months of age in  
21 7 sites in Africa and Asia (Mali, The Gambia, Kenya, Mozambique, Bangladesh, India, and  
22 Pakistan). Data were collected in December 2007 – March 2011. MSD was defined as 3 or more

23 looser than normal stools in the previous 24 hours lasting 7 days or less, and had to be new-onset  
24 (after  $\geq 7$  days diarrhea-free) accompanied by one or more of the following: dysentery (blood in  
25 stool observed by the caretaker, clinician, or laboratory), dehydration (decreased skin turgor,  
26 sunken eyes more than normal, or IV rehydration prescribed or given), or hospital admission.  
27 MSD cases were enrolled at initial presentation to a sentinel health center or hospital serving the  
28 site's censused population. Participants received care consistent with WHO guidelines, including  
29 antibiotic treatment for dysentery and suspected cholera, zinc therapy, and nutritional support for  
30 children with severe acute malnutrition. Using standardized questionnaires, demographics,  
31 epidemiological, and clinical information was collected at presentation from caregivers. In  
32 addition, clinic staff conducted physical exams, including anthropometry and stool sample  
33 collection which have undergone conventional and molecular testing to ascertain diarrhea  
34 etiology. After approximately 60 (up to 91) days after enrollment, fieldworkers visited the homes  
35 of participants to repeat anthropometry and collect standardized clinical and epidemiological  
36 information.

37 Participants' caregivers provided informed consent, in writing or witnessed if caregivers  
38 were illiterate. The GEMS study protocol was approved by ethical review boards at each field  
39 site and the University of Maryland, Baltimore, USA.

#### 40 Study Population for Validation Cohort (Kilifi)

41 We externally validated our CPMs using data from the Kilifi Health and Demographic  
42 Surveillance System (KHDSS) and Kilifi County Hospital (KCH) in Kenya[2]. Children 2-59  
43 months of age who presented with diarrhea to KCH and were resident within the KHDSS were  
44 enrolled between January 2007 and December 2015. Similar systematic demographic,  
45 epidemiological, and clinical information was collected at admission to KCH. Diarrhea was

46 defined as 3 or more looser than normal stools in the previous 24 hours. Inpatient treatment was  
47 provided as per WHO guidelines, including treatment for severe acute malnutrition. Their  
48 survival status after hospital discharge was followed through quarterly census in the KHDSS up  
49 to August 2017.

50 Participants' caregivers provided written informed consent. The study was approved by  
51 the Kenya Medical Research Institute (KEMRI) National Ethical Review Committee.

## 52 Outcomes

53 We examined three related outcomes: death at any time after enrollment at the health  
54 facility (after admission to the health center), death at the enrolment health center (after  
55 admission, before discharge), and post-discharge death (reported by caregiver (GEMS) or census  
56 (KHDSS) reported death after being discharged from medical care within 91 days post-  
57 enrollment). Children who died at the enrolment health center or for whom post-discharge  
58 follow-up data were missing were excluded from the post-discharge death analysis.

## 59 Predictive Variables

60 Over 130 potential GEMS predictors were considered, including descriptors of the child,  
61 household, and community (Supplemental Table S1). We did not consider aggregate scores as  
62 potential predictors (e.g. wealth index), as their clinical use would necessitate collecting multiple  
63 variables, each of which were already individually considered in the CPM.

## 64 Statistical Analysis

65 We developed our CPMs using a multistep process. First, we screened variables using  
66 random forests to rank possible predictors by their predictive importance. Random forests are an  
67 ensemble learning method whereby multiple decision trees (1000 throughout this analysis) are  
68 built on bootstrapped samples of the data with only a random sample of potential predictors

69 considered at each split, thereby decorrelating the trees and reducing variability[10]. In this  
70 analysis, the number of variables considered at each split was equal to the square root of the total  
71 number of potential variables, rounded down. We defined predictive importance as the reduction  
72 in mean squared prediction error that would be achieved by including the variable in the  
73 predictive model on out-of-bag samples (i.e. observations not in the bootstrapped sample).

74         Second, we used repeated cross-validation to assess generalizable model discrimination.  
75 For each of 100 iterations, separate logistic regression and random forest regression models were  
76 fit to a random 80% sample of the full analytic dataset (training set) using a subset of the top-  
77 ranked predictive variables. We examined the top 1-10, 15, 20, 30, 40, and 50 of predictors. Each  
78 of these models were then used to predict the outcome on the remaining 20% of the analytic data  
79 (testing set). We used the receiver operating characteristic (ROC) curves and the cross-validated  
80 C-statistic (area under the ROC curve (AUC)) to assess model discrimination. Discrimination is  
81 defined as how well a model can separate individuals who will or will not experience the  
82 outcome, in this case death.

83         Third, we assessed model calibration, or agreement between the predicted and observed  
84 risk of the outcome. We assessed calibration-in-the-large, or calibration intercept, by using  
85 logistic regression to estimate the mean while subtracting out the estimate (model the log-odds of  
86 the true status, offset by the CPM-predicted log-odds). We assessed the spread of the estimated  
87 probabilities using calibration slope. To do this, we fit a logistic regression model CPM-  
88 predicted log-odds as the independent variable and log-odds of the true status as the dependent  
89 variable. We also graphically assessed “moderate calibration.” We calculated the predicted  
90 probability of death for each child in a given analysis using each iteration of each n-variable  
91 model fit. We then binned these predicted probabilities into deciles, and calculated the

92 proportion of each decile who truly experienced the outcome for each iteration of each n-variable  
93 model. We then calculated the mean predicted probability and mean observed proportion for  
94 each decile across iterations, and then plotted these averages for each n-variable model[11] (see  
95 GitHub).

#### 96 Sensitivity Analyses

97 We undertook a variety of sensitivity and subgroup analyses in the GEMS data to  
98 validate our predictive models. First, we explored age-strata specific CPMs for children 0-  
99 11months, 12-23months, and 24-59 months. Second, we explored site-specific CPMs. Finally,  
100 we fit a model to one continent and validated it on the other as a quasi-external validation. All  
101 analysis was conducted in R 4.0.2 using the packages “ranger,” “cvAUC,” and “pROC.”

#### 102 External Validation and Comparison to Known Risk Factors

103 We fit our final CPM in GEMS data, and then applied it to the Kilifi data to evaluate its  
104 performance in a new population. As a sensitivity analysis, we fit our CPM to GEMS data only  
105 from Kenya, and evaluated its performance in Kilifi data. As an additional evaluation, we  
106 assessed how our CPM would have performed as a screening test to identify children at highest  
107 risk of dying after presenting to care. We evaluated this by using the final CPM to calculate the  
108 predicted probability of death for children in GEMS. We then explored test performance  
109 (sensitivity, specificity, etc.) of different predicted probability cutoffs. Previous studies have  
110 identified age and MUAC as key risk factors for death following diarrhea[12]. Given the  
111 variables identified as top predictors (see Results), we also compared the performance of our  
112 CPM as a screening tool to specific patient subpopulations known to be at elevated mortality  
113 risk, namely children 0-6 months of age, and children with MUAC<12.5.

#### 114 RESULTS

115

116 Death in children following acute diarrhea in GEMS

117           There were 9439 children with MSD enrolled in GEMS. Of these, 840 children were  
118 excluded for having missing follow-up data, and 79 were excluded for having follow-up data  
119 outside of the 91 day study follow-up period, leaving an analytic sample of 8520. An additional  
120 460 observations were dropped for missing predictor data, leaving 8060. Of these, 165 (2.0%) of  
121 children died by 91 days after enrollment, including 43 (0.5%) during treatment, and 122 (1.5%  
122 of remaining) after discharge (Supplemental Figure S1).

123 Derivation of a CPM to identify children likely to die following acute diarrhea using GEMS data

124           In GEMS data, the top predictors of death after enrollment are listed in Table 1 and were:  
125 mid-upper arm circumference (MUAC), respiratory rate, temperature, age (months), number of  
126 people living in the household, number of days of diarrhea at presentation, how much the child  
127 has been offered to drink since diarrhea began, number of children <60 months old living in the  
128 household, abnormal hair (e.g. sparse, loose, straight, etc.), and number of rooms used for  
129 sleeping, with an AUC of 0.83 (95% CI: 0.81, 0.86) for a 10-variable model. The logistic  
130 regression models consistently performed better than the random forest regressions (see  
131 Supplemental Figure S2), so we present only the logistic regression models moving forward.

132           The maximum AUC attained with the model predicting any death after enrollment was  
133 0.88 (95% CI: 0.87, 0.90) with a model of 30 variables, while an AUC of 0.84 (95% CI: 0.82,  
134 0.86), 0.86 (95% CI: 0.84, 0.88) and 0.86 (95% CI: 0.84, 0.88) was obtained with a CPM of 2, 5,  
135 and 10 variables, respectively (Supplemental Figure S2). At a sensitivity of 0.80, we achieved a  
136 specificity of 0.75 with 10 predictors, and at a sensitivity of 0.90, a specificity of 0.62 (Figure 1).  
137 For the CPM predicting any death after enrollment, the calibration-in-the-large, or intercept, was



138 consistently close to 0 for models with 1 to 10 predictor variables, indicating the predicted  
139 probability of death was close to the average observed probability of death. The calibration slope  
140 was consistently close to 1, indicating the spread of predicted probabilities of death was similar  
141 to the spread of observed probabilities for models including 1 to 10 predictor variables (Table 2,  
142 Figure 2). The CPM to predict any death (AUC=0.86, 95% CI: 0.84, 0.88) had very similar  
143 discriminative ability compared to the model only predicting death in treatment (AUC=0.85,  
144 95% CI: 0.82, 0.88) and death post-discharge (AUC=0.86, 95% CI: 0.84, 0.88). Top predictors  
145 were similar across all three models. Odds ratios for the 10-variable model predicting any death  
146 are shown in Supplemental Table S2.

147 External validation of a CPM to identify children likely to die following acute diarrhea

148         Given the discriminative performance observed in Table 1 and Figure S2, we elected to  
149 proceed with a single CPM for death after enrollment, with MUAC and respiratory rate as  
150 predictors. The CPM had good performance on internal cross-validation in GEMS (AUC=0.85,  
151 95% CI: 0.82, 0.88), with a decrease in discriminative ability at external validation in Kilifi data  
152 (AUC=0.74, 95% CI: 0.71, 0.77). On average, the CPM underestimated the probability of death  
153 (calibration intercept=0.82, 95% CI: 0.68, 0.97), and predictions tended to be too extreme  
154 (calibration slope=0.61, 95% CI: 0.52, 0.70) (Table 2, Figure 2). Model performance was similar  
155 when the CPM was derived only in GEMS data from Kenya and validated on data from Kilifi  
156 (see Supplemental Figure S3 and Table S3).

157 Discriminative performance of the CPM to identify children likely to die following acute  
158 diarrhea was generally consistent across age and location subpopulations

159         The results of the sensitivity analyses are presented in Supplemental Table S4. Top  
160 predictor variables were highly consistent across models and included patient demographics,

161 patient symptoms, and indicators of household wealth. While the CPM fit to patients age 24-59  
162 months had a slightly higher AUC compared to the overall model (AUC=0.91, 95% CI: 0.87,  
163 0.95 for 2-variables for ages 24-59months vs AUC=0.84, 95% CI: 0.82, 0.86), this is the patient  
164 population with the lowest overall risk of death (Supplemental Table S5). The CPMs fit solely to  
165 each of the GEMS sites in Africa all had similar performance to the overall model, whereas there  
166 were too few outcomes in the GEMS sites in Asia to fit country-specific models (see  
167 Supplemental Tables S4 and S6). In our quasi-external validation, the model was fit to GEMS  
168 data from all the sites in Africa, the AUC was almost identical to the overall model, and  
169 performed excellently in GEMS data from the Asian sites (AUC=0.93, 95% CI 0.90, 0.96) (see  
170 Supplemental Table S4).

171 A screening tool based on our CPM could improve upon risk-factor based screening to identify  
172 children likely to die following acute diarrhea

173 Using the 2-variable CPM derived in GEMS described above, we explored how  
174 accurately our CPM identified children who went on to die during our study period. Using a  
175 CPM-derived predicted probability of  $\geq 0.10$  as a positive screen for risk of death, we observed a  
176 sensitivity (Se) of 0.28 and a negative predictive value (NPV) of 0.98 in GEMS. In contrast,  
177 using an observed MUAC of  $< 12.5$  as a positive screen for death resulted in a Se of 0.66 and a  
178 NPV of 0.99. However, almost 6 times as many children screened positive for risk of death using  
179 the MUAC-based approach compared to our CPM-based approach (17.5% vs 3.1% of patients  
180 screen positive). Increasing the predicted probability threshold of our CPM screen led to  
181 decreasing sensitivity and fewer children screening positive (see Supplemental Table S7).

182 **DISCUSSION**

183 We used a combination of machine learning and conventional regression methods to  
184 derive and externally validate clinical prognostic models for death following acute diarrhea. Our  
185 CPM to predict death in community-dwelling children at the time they present for care for acute  
186 MSD had good discriminative ability in the derivation dataset (GEMS AUC=0.84, 95% CI: 0.82,  
187 0.86) as well as at external validation (Kilifi AUC=0.74, 95% CI: 0.71, 0.77). There have  
188 previously been limited efforts to identify which children are more likely to die after presenting  
189 to care for acute diarrhea. While a number of studies have explored risk factors of post-discharge  
190 mortality after seeking care for diarrhea in LMICs [1, 2, 13], prediction tools have been lacking.  
191 Our CPM for mortality suggests the potential for parsimonious clinical prognostic model(s) to  
192 guide appropriate triage and follow-up for young children with acute diarrhea.

193 In our model derivation, we found a similar set of top predictors for the categories of: any  
194 death after enrollment, death during treatment, and death after discharge, as well as for different  
195 age subgroups and GEMS study sites. Mid upper arm circumference (MUAC) was the top  
196 predictor for all CPMs. Low MUAC has previously been recognized as a good predictor of  
197 mortality[14, 15]. While MUAC is somewhat affected by acute dehydration, it is much less  
198 impacted than other markers of malnutrition (e.g. weight-for-length z-score)[16, 17]. In  
199 addition, MUAC is currently only recommended as an indicator of SAM in children 6 months of  
200 age and above, there is growing evidence in support of its use in children <6 months[18-20]. The  
201 use of MUAC as a key predictor in risk of death is also supported by a recent prospective cohort  
202 study (CHAIN) of children 2-23 months of age who presented to care for acute illness in 6  
203 LMICs. The authors found that nutritional status was directly associated with death 30 days from  
204 admission, capturing a range of underlying risks[5], and that MUAC was a top predictor of  
205 death[21].

206 We found similar discriminative ability for predicting death at different time points (in  
207 treatment, post-discharge), in different age subsets, and at different GEMS study sites. As  
208 predictors in our derivation dataset were collected only at enrollment, we were unable to  
209 examine if updated values at discharge could improve our post-discharge mortality prediction.  
210 However, others have found no differences in cross-validated discriminative ability even with  
211 updated predictors at discharge[5].

212 Our CPM is promising as a screening tool to identify children likely to die after  
213 presentation, and therefore who may benefit from more intensive care and follow-up. While  
214 young age and poor nutritional status are known risk factors of poor diarrhea outcomes, our CPM  
215 performed better than simple age and MUAC based cutoff screening criteria. The highest  
216 screening sensitivity was achieved by using  $MUAC < 12.5$  as a screening cutoff for all children  
217 age 0-59mo ( $Se=0.66$ ), meaning this screening protocol correctly captured two-thirds of children  
218 who died in the study period. Such screening at presentation would allow for early intervention  
219 and intensive follow-up to potentially avoid these deaths. However, using these criteria, 17.5%  
220 of presenting children would have screened positive. This may be an unrealistically large portion  
221 of children for whom to provide intensive treatment and follow-up care. In contrast, if our CPM-  
222 calculated predicted probability of death was used as a screening tool in GEMS, we would have  
223 correctly identified 28% of children who went on to die within the study period, while only  
224 having 3.1% of those presenting to care screen positive. Future research should explore the  
225 effectiveness, viability, and ethics of using such predictive screening tools to allocate limited  
226 resource-intensive acute and follow-up care.

227 Utilization of a CPM at time of clinical presentation could offer a timely and efficient  
228 way to identify children most likely to benefit from targeted, resource-intensive interventions

229 such as additional staffing during treatment, extended treatment at care facility, and at-home  
230 follow-up care post-discharge. However, this assumes the children predicted to die would avoid  
231 death with adequate intervention. A recent systematic review of interventions for post-acute  
232 diarrhea sequelae suggests that the majority of existing intervention strategies are not effective at  
233 reducing mortality[22]. While nutritional status was a top predictor of mortality in our study, it is  
234 important to note that all cases of severe acute malnutrition were treated according to WHO  
235 guidelines. This suggests that treating malnutrition at presentation is insufficient to avert the  
236 mortality seen in our study. Similarly, all cases of dysentery were treated with antibiotics  
237 according to WHO guidelines, but previous research has shown that *Shigella* spp was common  
238 among children without dysentery (and therefore did not meet antibiotic recommendations) who  
239 died in GEMS[23]. Additional research is needed in this area to develop effective interventions  
240 that reduce longer-term mortality risk following acute diarrhea in young children.

241 Our study has a number of strengths and limitations. We derived CPMs for death from a  
242 multi-site, prospective study that included longitudinal follow-up with extensive etiologic  
243 testing. We used random forests for variable selection, which do not require assumptions to be  
244 made about the underlying variables. They also tend to outperform[24] conventional model  
245 building techniques. Our modeling strategy required complete predictor data, and we dropped  
246 approximately 5% of eligible observations in GEMS due to missing predictor data. Fortunately,  
247 the distribution of top predictive variables was generally very similar between dropped and  
248 retained observations (Supplemental Table S8). We were also able to externally validate our  
249 CPM in a similar setting with a similar distribution of patient characteristics (Supplemental  
250 Figure S4), with promising results. However, the patient population was likely less healthy at  
251 presentation in our external validation dataset than our derivation datasets, as evidence by the

252 higher mortality rate (Supplemental Table S6). While the CPM had good discriminative ability at  
253 external validation, the model calibration needs improvement and should be prospectively  
254 validated before its ready for clinical application.

255 In conclusion, we used data from a large multi-country study to derive and an external  
256 dataset to validate clinical prognostic models for death. Our findings suggest it is possible to  
257 identify children most likely to die after presenting to care for acute diarrhea. This could  
258 represent a novel and cost-effective way to target resources for the prevention of childhood  
259 mortality.

260

## TABLES

Table 1: **DEATH:** Variable importance ordering and cross-validated average overall AUC, AUC by timing of death, and 95% confidence intervals for a 5 (bold) and 10 (italicized) variable logistic regression model for predicting death 60/90 days after acute diarrhea presentation (enrollment) in children 0-59mo in 7 LMICs derived from GEMS data.

|                                | Death at any time                                       | Death in treatment                                      | Death after discharge                                   |
|--------------------------------|---------------------------------------------------------|---------------------------------------------------------|---------------------------------------------------------|
| Variable/<br>Patient<br>Subset | n=165/8060                                              | 43/8060                                                 | 122/8017                                                |
| 1                              | MUAC                                                    | MUAC                                                    | MUAC                                                    |
| 2                              | Respiratory rate                                        | Respiratory rate                                        | Respiratory rate                                        |
| 3                              | Temperature                                             | Age (months)                                            | Temperature                                             |
| 4                              | Age (months)                                            | Temperature                                             | Age (months)                                            |
| 5                              | Num. people living in household                         | Num. people living in household                         | Num. people living in household                         |
| 6                              | Num. days of diarrhea at presentation                   | Num. days of diarrhea at presentation                   | Num. days of diarrhea at presentation                   |
| 7                              | Since diarrhea starts, how much offering child to drink | Num. children <60months live in household               | Since diarrhea starts, how much offering child to drink |
| 8                              | Num. children <60months live in household               | Dad_live                                                | Num. children <60months live in household               |
| 9                              | Abnormal hair (e.g. sparse, loose, straight)            | Num. rooms used for sleeping                            | Num. rooms used for sleeping                            |
| 10                             | Num. rooms used for sleeping                            | Since diarrhea starts, how much offering child to drink | Abnormal hair (e.g. sparse, loose, straight)            |
| AUCs                           | <b>0.86 (0.84, 0.88)</b>                                | <b>0.87 (0.84, 0.89)</b>                                | <b>0.85 (0.83, 0.87)</b>                                |
|                                | <i>0.86 (0.84, 0.88)</i>                                | <i>0.85 (0.82, 0.88)</i>                                | <i>0.86 (0.84, 0.88)</i>                                |

Table 2: Calibration intercept and slope

| Number of predictor variables | GEMS 0-59mo Intercept (95% CI)                                        | Slope (95% CI)   | GEMS-derived model applied to KILIFI data Intercept (95% CI) | Slope (95% CI)    |
|-------------------------------|-----------------------------------------------------------------------|------------------|--------------------------------------------------------------|-------------------|
| 1                             | $3.6 \times 10^{-2}$ ( $-3.4 \times 10^{-1}$ , $3.8 \times 10^{-1}$ ) | 1.0 (0.75, 1.3)  |                                                              |                   |
| 2                             | $3.5 \times 10^{-2}$ ( $-3.4 \times 10^{-1}$ , $3.8 \times 10^{-1}$ ) | 1.0 (0.76, 1.3)  | 0.82 (0.68, 0.97)                                            | 0.61 (0.52, 0.70) |
| 3                             | $2.7 \times 10^{-2}$ ( $-3.5 \times 10^{-1}$ , $3.7 \times 10^{-1}$ ) | 1.0 (0.77, 1.3)  |                                                              |                   |
| 4                             | $2.4 \times 10^{-2}$ ( $-3.6 \times 10^{-1}$ , $3.7 \times 10^{-1}$ ) | 1.0 (0.79, 1.3)  |                                                              |                   |
| 5                             | $2.1 \times 10^{-2}$ ( $-3.6 \times 10^{-1}$ , $3.7 \times 10^{-1}$ ) | 1.0 (0.78, 1.3)  |                                                              |                   |
| 6                             | $1.7 \times 10^{-2}$ ( $-3.7 \times 10^{-1}$ , $3.6 \times 10^{-1}$ ) | 0.99 (0.75, 1.2) |                                                              |                   |
| 7                             | $2.7 \times 10^{-3}$ ( $-3.8 \times 10^{-1}$ , $3.5 \times 10^{-1}$ ) | 0.95 (0.73, 1.2) |                                                              |                   |
| 8                             | $1.1 \times 10^{-2}$ ( $-3.8 \times 10^{-1}$ , $3.6 \times 10^{-1}$ ) | 0.95 (0.73, 1.2) |                                                              |                   |
| 9                             | $1.8 \times 10^{-2}$ ( $-3.7 \times 10^{-1}$ , $3.7 \times 10^{-1}$ ) | 0.94 (0.72, 1.2) |                                                              |                   |
| 10                            | $2.5 \times 10^{-2}$ ( $-3.6 \times 10^{-1}$ , $3.8 \times 10^{-1}$ ) | 0.93 (0.71, 1.2) |                                                              |                   |



## FIGURES

Figure 1: **ROC curves:** Average ROC curves from the cross-validated logistic regression models predicting growth faltering and death with 2, 5, and 10 predictors. The faded dashed lines represent examples of specificities (1- false positive rate) that could be achieved with a sensitivity (true positive rate) of 0.80 for prediction of each outcome.

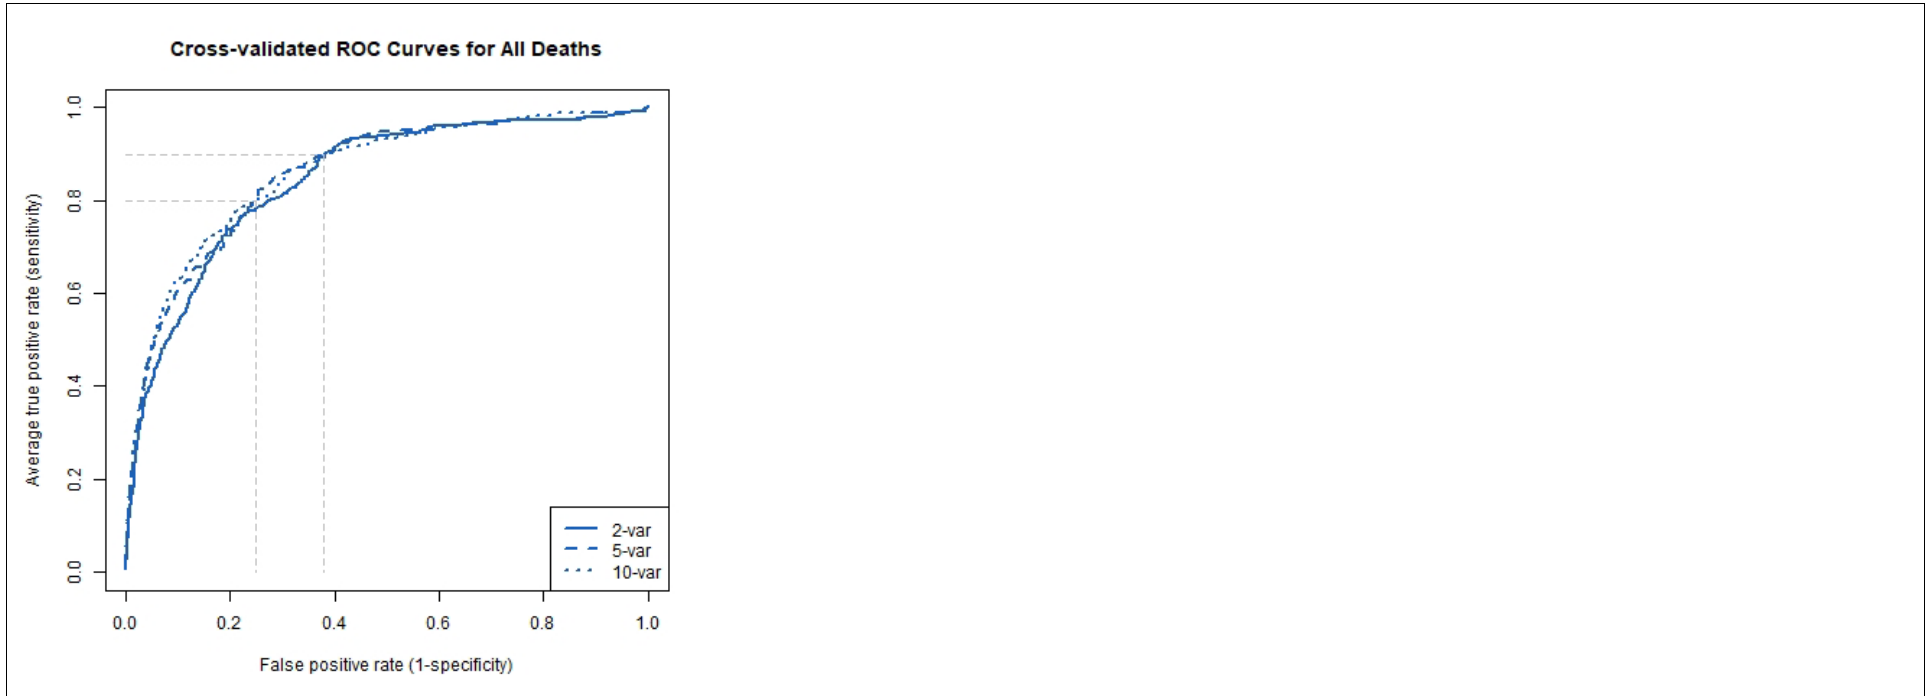

Figure 2: **2-Variable CPM for death after presentation:** Calibration curve and discriminative ability of 2-variable (MUAC, respiratory rate) model predicting death after presentation to care for acute diarrhea in LMICs.

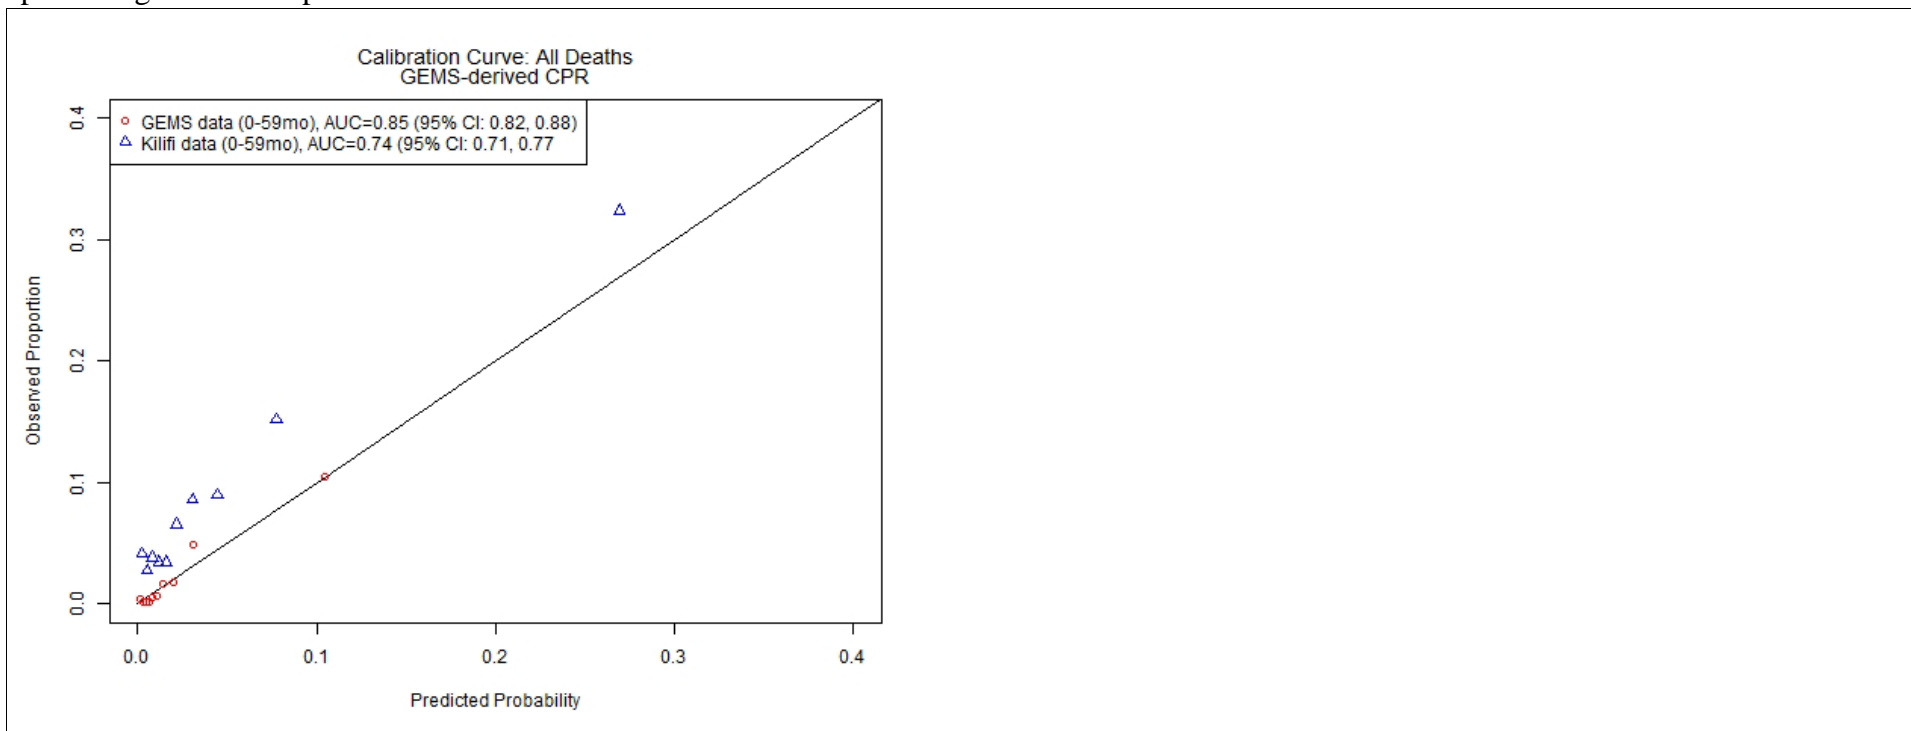

## REFERENCES

1. Mukasa, O., et al., *A cohort study of survival following discharge from hospital in rural Tanzanian children using linked data of admissions with community-based demographic surveillance*. Emerg Themes Epidemiol, 2021. **18**(1): p. 4.
2. Talbert, A., et al., *Mortality after inpatient treatment for diarrhea in children: a cohort study*. BMC Med, 2019. **17**(1): p. 20.
3. Veirum, J.E., et al., *Increased mortality in the year following discharge from a paediatric ward in Bissau, Guinea-Bissau*. Acta Paediatr, 2007. **96**(12): p. 1832-8.
4. Nemetcheq, B., et al., *Paediatric postdischarge mortality in developing countries: a systematic review*. BMJ Open, 2018. **8**(12): p. e023445.
5. Childhood Acute, I. and N. Nutrition, *Childhood mortality during and after acute illness in Africa and south Asia: a prospective cohort study*. Lancet Glob Health, 2022. **10**(5): p. e673-e684.
6. Wiens, M.O., et al., *Pediatric post-discharge mortality in resource poor countries: a systematic review*. PLoS One, 2013. **8**(6): p. e66698.
7. Kotloff, K.L., et al., *Burden and aetiology of diarrhoeal disease in infants and young children in developing countries (the Global Enteric Multicenter Study, GEMS): a prospective, case-control study*. Lancet, 2013. **382**(9888): p. 209-22.
8. Reilly, B.M. and A.T. Evans, *Translating clinical research into clinical practice: impact of using prediction rules to make decisions*. Ann Intern Med, 2006. **144**(3): p. 201-9.
9. Kotloff, K.L., et al., *The Global Enteric Multicenter Study (GEMS) of diarrheal disease in infants and young children in developing countries: epidemiologic and clinical methods of the case/control study*. Clin Infect Dis, 2012. **55 Suppl 4**: p. S232-45.
10. James, G., et al., *An Introduction to Statistical Learning with Applications in R*. Springer Texts in Statistics. 2013, New York: Springer.
11. Van Calster, B., et al., *Calibration: the Achilles heel of predictive analytics*. BMC Med, 2019. **17**(1): p. 230.
12. Tickell, K.D., et al., *The effect of acute malnutrition on enteric pathogens, moderate-to-severe diarrhoea, and associated mortality in the Global Enteric Multicenter Study cohort: a post-hoc analysis*. Lancet Glob Health, 2020. **8**(2): p. e215-e224.
13. McDonald, C.M., et al., *The effect of multiple anthropometric deficits on child mortality: meta-analysis of individual data in 10 prospective studies from developing countries*. Am J Clin Nutr, 2013. **97**(4): p. 896-901.
14. Sachdeva, S., et al., *Mid-upper arm circumference v. weight-for-height Z-score for predicting mortality in hospitalized children under 5 years of age*. Public Health Nutr, 2016. **19**(14): p. 2513-20.
15. Taneja, S., et al., *Mid upper arm circumference as a predictor of risk of mortality in children in a low resource setting in India*. PLoS One, 2018. **13**(6): p. e0197832.
16. Mwangome, M.K., et al., *Are diagnostic criteria for acute malnutrition affected by hydration status in hospitalized children? A repeated measures study*. Nutr J, 2011. **10**: p. 92.
17. Modi, P., et al., *Midupper Arm Circumference Outperforms Weight-Based Measures of Nutritional Status in Children with Diarrhea*. J Nutr, 2015. **145**(7): p. 1582-7.
18. Mwangome, M.K., et al., *Mid-upper arm circumference at age of routine infant vaccination to identify infants at elevated risk of death: a retrospective cohort study in the Gambia*. Bull World Health Organ, 2012. **90**(12): p. 887-94.
19. Zehra, M., et al., *Mid-Upper Arm Circumference Assessment and Comparison With Weight for Length Z-Score in Infants  $\leq$  6 Months as an Indicator of Severe Acute Malnutrition*. Cureus, 2021. **13**(9): p. e18167.
20. Jima, B.R., et al., *Diagnostic performance of midupper arm circumference for detecting severe wasting among infants aged 1-6 months in Ethiopia*. Am J Clin Nutr, 2020.

21. CHAIN, *Characterising paediatric mortality during and after acute illness in Sub-Saharan Africa and South Asia: a secondary analysis of the CHAIN cohort using a machine learning approach*. *eClinicalMedicine*, 2023. **57**.
22. Pavlinac, P.B., et al., *Interventions to reduce post-acute consequences of diarrheal disease in children: a systematic review*. *BMC Public Health*, 2018. **18**(1): p. 208.
23. Levine, M.M., et al., *Diarrhoeal disease and subsequent risk of death in infants and children residing in low-income and middle-income countries: analysis of the GEMS case-control study and 12-month GEMS-1A follow-on study*. *Lancet Glob Health*, 2020. **8**(2): p. e204-e214.
24. Singal, A.G., et al., *Machine learning algorithms outperform conventional regression models in predicting development of hepatocellular carcinoma*. *Am J Gastroenterol*, 2013. **108**(11): p. 1723-30.
